# Supplementary material for: Assessment of global coagulation function under treatment with emicizumab concomitantly with bypassing agents in haemophilia A with inhibitor (UNEBI Study): multicentre open-label non-randomised clinical trial
Source: HighWire-hosted journal article supplement (doi:10.1136/bmjopen-2021-056922), 2022-02-01
Supplement: bmjopen-2021-056922supp001_data_supplement.pdf [file bmjopen-2021-056922supp001_data_supplement.pdf]

Supplemental Table. Schedule of the blood examination. **Bold**, performed in the presence or absence of anti-emicizumab monoclonal antibodies; \*, Anti-ADAMTS-13 antibody is also measured when ADAMTS-13 activity is low (< 10%); #, performed with samples obtained only in Nara Medical University.

|                                                                                                                                                                                                | Observation time points<br>(month) |    |    |    | Event: BPA infusion at breakthrough bleeds or perioperative management |                |
|------------------------------------------------------------------------------------------------------------------------------------------------------------------------------------------------|------------------------------------|----|----|----|------------------------------------------------------------------------|----------------|
|                                                                                                                                                                                                | 0                                  | 12 | 24 | 36 | Pre BPA                                                                | Post BPA       |
| Standard laboratory tests: WBC, RBC, haemoglobin, haematocrit, platelets, AST, ALT, LDH, total bilirubin, indirect bilirubin, BUN, creatinine, fibrinogen, plasminogen, FDP, D-dimer, TAT, PIC | +                                  | +  | +  | +  | +                                                                      | +              |
| Global assays: <b>TGT, CWA, CFWA</b>                                                                                                                                                           |                                    |    |    |    |                                                                        |                |
| TMA/TE-related tests: VWF:RCo, VWF:Ag, ADAMTS-13 activity, Anti-ADAMTS-13 antibody*                                                                                                            | +                                  | +  | +  | +  | +                                                                      | +              |
| TMA/TE-related tests: VWF multimer analysis,                                                                                                                                                   | -                                  | -  | -  | -  | +                                                                      | +              |
| Whole blood global assays: <b>ROTEM</b> , T-TAS, platelet aggregometry                                                                                                                         | -                                  | -  | -  | -  | + <sup>#</sup>                                                         | + <sup>#</sup> |

BPA, bypassing agent; WBC, white blood cells; RBC, red blood cells; AST, aspartate aminotransferase; ALC, alanine aminotransferase; LDH, lactate dehydrogenase; BUN, blood urea nitrogen; FDP, fibrin/fibrinogen degradation product; TAT, thrombin-antithrombin complex; PIC, plasmin-plasmin inhibitor complex; TGT, thrombin generation test; CWA, clot waveform analysis; CFWA, clot-fibrinolysis waveform analysis; TMA, thrombotic microangiopathy; TE, thromboembolism; VWF, von Willebrand factor; RCo, ristocetin cofactor activity; Ag, antigen; ADAMTS-13, a disintegrin and metalloproteinase with a thrombospondin type 1 motif, member 13; ROTEM, rotational thromboelastometry; T-TAS, total thrombus formation analysis system.
